# Supplementary material for: Vehicular pollution as the primary source of oxidative potential of PM2.5 in Bhubaneswar, a non-attainment city in eastern India
Source: Royal Society of Chemistry journal article supplement (doi:10.1039/d4em00150h), 2024-01-01
Supplement: d4em00150h1.pdf [file d4em00150h1.pdf]

## Vehicular Pollution as Primary Source of Oxidative Potential of PM<sub>2.5</sub> in Bhubaneswar, a non-attainment city in eastern India

Subhasmita Panda<sup>1,2</sup>, Chinmay Mallik<sup>3</sup>, S. Suresh Babu<sup>4</sup>, Sudhir Kumar Sharma<sup>2,5</sup>,  
Tuhin Kumar Mandal<sup>2,5</sup>, Trupti Das<sup>1,2</sup>, R. Boopathy<sup>1,2\*</sup>

### Supplementary Information

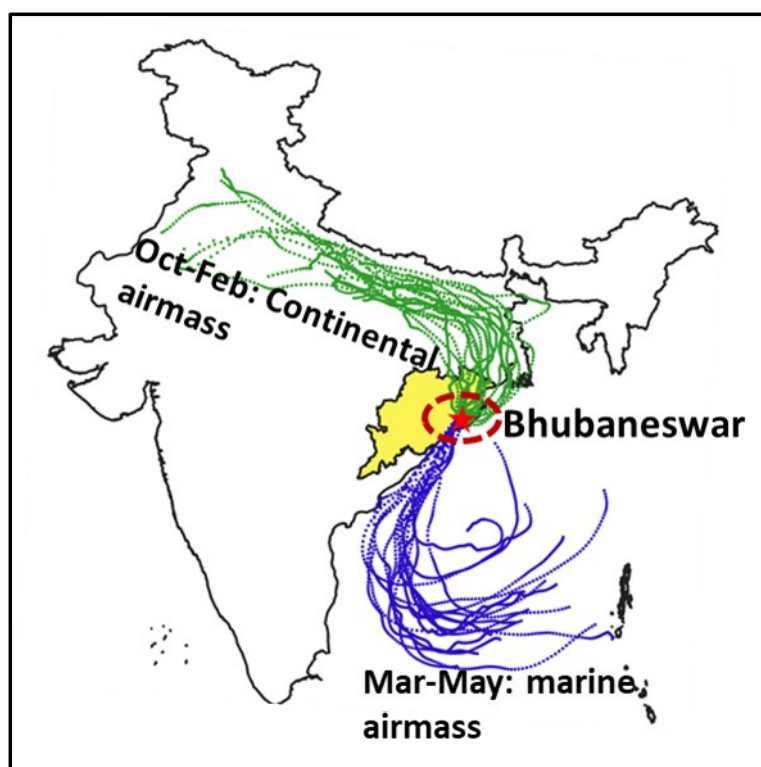

Fig. S1. Prevailing airmass during October-May at the study site during

**Table T1. General meteorological characteristics during (a) MAM period (b) CAM period**

**Table T1 (a).**

| <b>MAM</b>                | <b>Day</b>    |               |                               |                    | <b>Night</b>  |               |                               |                    |
|---------------------------|---------------|---------------|-------------------------------|--------------------|---------------|---------------|-------------------------------|--------------------|
| <b>Statistics</b>         | <b>T (°C)</b> | <b>RH (%)</b> | <b>WS (km h<sup>-1</sup>)</b> | <b>WD (degree)</b> | <b>T (°C)</b> | <b>RH (%)</b> | <b>WS (km h<sup>-1</sup>)</b> | <b>WD (degree)</b> |
| <b>Mean</b>               | 32.92         | 71.96         |                               |                    | 28.24         | 88.88         |                               |                    |
| <b>Median</b>             | 34.28         | 68.91         | 12.08                         | 170                | 28.33         | 90.84         | 10.30                         | 184                |
| <b>Standard deviation</b> | 1.88          | 9.31          |                               |                    | 1.32          | 4.41          |                               |                    |

**Table T1 (b).**

| <b>CAM</b>                | <b>Day</b>    |               |                               |                    | <b>Night</b>  |               |                               |                    |
|---------------------------|---------------|---------------|-------------------------------|--------------------|---------------|---------------|-------------------------------|--------------------|
| <b>Statistics</b>         | <b>T (°C)</b> | <b>RH (%)</b> | <b>WS (km h<sup>-1</sup>)</b> | <b>WD (degree)</b> | <b>T (°C)</b> | <b>RH (%)</b> | <b>WS (km h<sup>-1</sup>)</b> | <b>WD (degree)</b> |
| <b>Mean</b>               | 25.59         | 68.57         |                               |                    | 21.18         | 82.84         |                               |                    |
| <b>Median</b>             | 26.83         | 56.74         | 5.4                           | 44                 | 20.40         | 87.47         | 0                             | 31                 |
| <b>Standard deviation</b> | 1.10          | 6.97          |                               |                    | 1.43          | 4.83          |                               |                    |

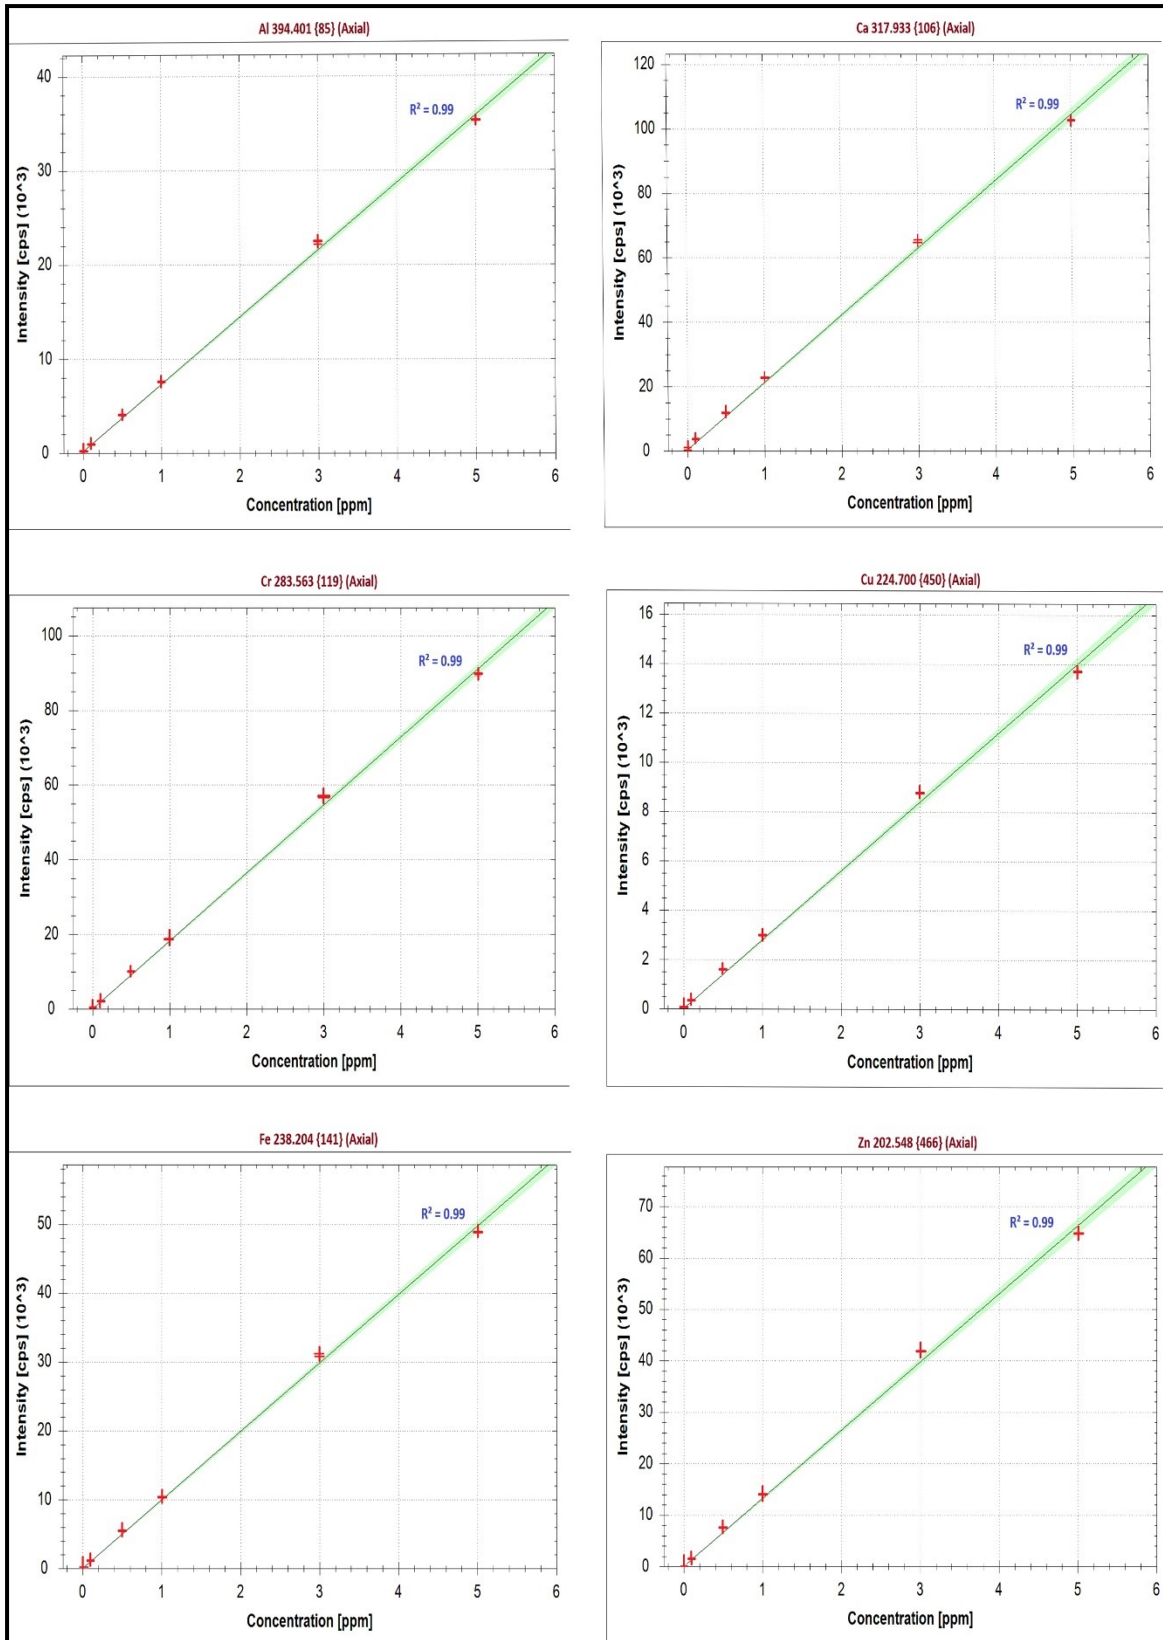

**Fig. S2. Standard curve of quantification of some metals (Al, Ca, Cr, Cu, Zn, Fe) obtained from ICP-OES, iCAP 7600 Duo.**

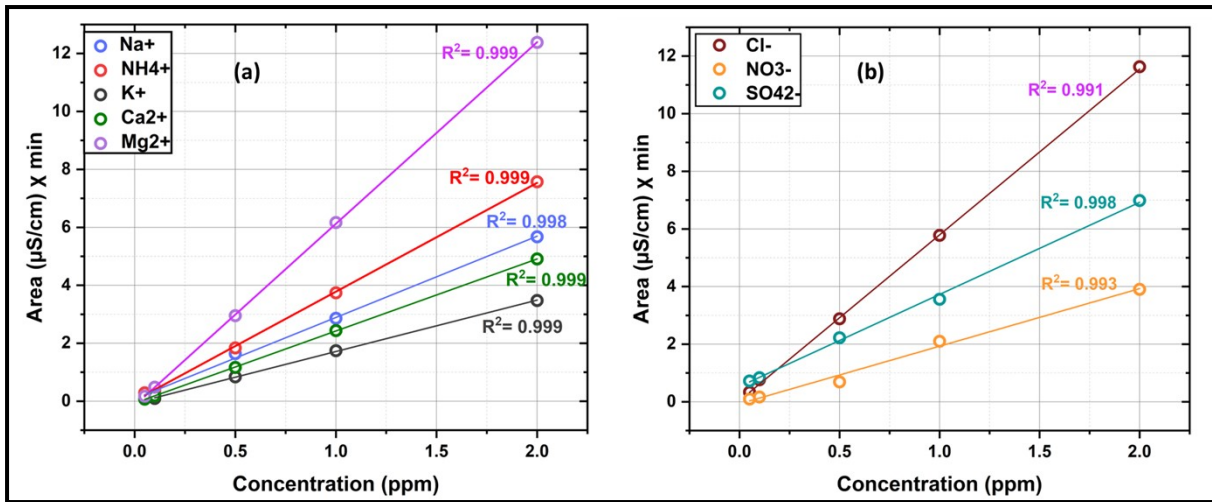

Fig. S3. Standard curve of quantification of measured (a) cations and (b) anions.

Table T2. The minimum detection limit (MDL) of blank filters based on three times the standard deviation of 10 blank filters.

| Species                       | MDL ( $\mu\text{g m}^{-3}$ ) |
|-------------------------------|------------------------------|
| Cl <sup>-</sup>               | 0.133                        |
| SO <sub>4</sub> <sup>2-</sup> | 0.057                        |
| NO <sub>3</sub> <sup>-</sup>  | 0.108                        |
| NH <sub>4</sub> <sup>+</sup>  | 0.048                        |
| Ca <sup>2+</sup>              | 0.088                        |
| Mg <sup>2+</sup>              | 0.004                        |
| K <sup>+</sup>                | 0.016                        |
| Na <sup>+</sup>               | 0.030                        |
| Ba                            | 0.007                        |
| Cr                            | 0.018                        |
| Fe                            | 0.019                        |
| Ni                            | 0.013                        |
| Cu                            | 0.024                        |
| Zn                            | 0.019                        |
| Ca                            | 0.003                        |
| Mn                            | 0.007                        |
| Mg                            | 0.01                         |
| Al                            | 0.04                         |
| Pb                            | 0.008                        |
| Ti                            | 0.016                        |
| OC                            | 0.527                        |
| EC                            | 0.197                        |

Text 1: To calculate ss and nss fraction of ions (Farren et al., 2019; Thakur and Thamban, 2019)

$$ssNa^+ = \frac{R_C \times Na^+ - Ca^{2+}}{R_C - R_M} \quad (1)$$

Where  $R_C$  = average ratio of  $Ca^{2+}/Na^+$  in crust, 1.78,  $R_M$  = average ratio of  $Ca^{2+}/Na^+$  in marine.

$$nssNa^+ = total Na^+ - ssNa^+ \quad (2)$$

$$nssK^+ = K^+ - 0.038 \times ssNa^+ \quad (3)$$

$$nssMg^{2+} = Mg^{2+} - 0.12 \times ssNa^+ \quad (4)$$

$$nssCa^{2+} = Ca^{2+} - 0.038 \times ssNa^+ \quad (5)$$

$$nssSO_4^{2-} = SO_4^{2-} - 0.25 \times ssNa^+ \quad (6)$$

## Text 2

PMF considers data sets of the chemical species (in  $\mu g/m^3$ ) as  $[n \times m]$  matrix where  $n$  is the number of samples and  $m$  is the measured chemical species. The main goal of the model is to determine the number of factors ( $p$ ), source profile ( $f$ ) of each source and the relative contribution  $g$  by each factor to each measured sample as given in equation 7.

$$x_{ij} = \sum_{k=1}^p g_{ik} f_{kj} + e_{ij} \quad (7)$$

where  $x_{ij}$  is the concentrations of species  $j$  measured on sample  $i$ ,  $p$  is the number of factors,  $g_{ik}$  is the relative contribution of factor  $k$  to sample  $i$ ,  $f_{kj}$  is the concentration of species  $j$  in the emission profile of factor  $k$ , and  $e_{ij}$  is the residuals in the PMF result for species  $j$  on sample  $i$ .

The main objective is to find the best combination of  $g_{ik}$  and  $f_{kj}$  to reproduce  $x_{ij}$ . The values of  $f_{kj}$  and  $g_{ik}$  were determined by minimizing  $Q$  for a given factor number  $p$ , and  $Q$  can be defined as follows.

$$Q = \sum_{j=1}^m \sum_{i=1}^n \frac{e_{ij}^2}{s_{ij}^2} \quad (8)$$

here  $s_{ij}$  is the uncertainty of species  $j$  on sample  $i$ .

The uncertainty,  $s_{ij}$  can be calculated as follows:

$$s_{ij} = \sqrt{(\text{Error fraction} \times \text{Concentration})^2 + (\text{MDL})^2} \quad (9)$$

where MDL is the minimum detection limit enlisted in **Table T2** and error fraction is the measure of the standard deviation of the species divided by the square root of the total number of analyzed species.

A complete description of the algorithm and mathematical equation is available elsewhere (Norris et al., 2014; Paatero, 1997; Paatero and Tapper, 1994).

**Table T3. S/N ratio of different species and their categorization in both the PMF run**

| Species | PMF-1 during MAM period |          | PMF-2 during CAM period |          |
|---------|-------------------------|----------|-------------------------|----------|
|         | S/N                     | Category | S/N                     | Category |
| Al      | 0.5                     | Weak     | 1.4                     | Strong   |
| Mg      | 6.5                     | Strong   | 7.0                     | Strong   |
| Ca      | 8.9                     | Strong   | 9.0                     | Strong   |
| Cu      | 8.6                     | Strong   | 8.8                     | Strong   |
| Cr      | 0.7                     | Weak     | 2.6                     | Strong   |
| Mn      | 0.1                     | Bad      | 1.2                     | Strong   |
| Fe      | 6.6                     | Strong   | 7.6                     | Strong   |
| Ni      | 0.0                     | Bad      | 0.0                     | Bad      |
| Ti      | 0.0                     | Bad      | 0.2                     | Bad      |
| Zn      | 2.5                     | Strong   | 4.2                     | Strong   |
| Pb      | 0.0                     | Bad      | 0.0                     | Bad      |

|                               |     |        |     |        |
|-------------------------------|-----|--------|-----|--------|
| Ba                            | 0.0 | Bad    | 0.1 | Bad    |
| Na <sup>+</sup>               | 8.7 | Strong | 8.4 | Strong |
| NH <sub>4</sub> <sup>+</sup>  | 8.9 | Strong | 9.0 | Strong |
| K <sup>+</sup>                | 8.6 | Strong | 8.8 | Strong |
| Ca <sup>2+</sup>              | 6.5 | Strong | 5.9 | Strong |
| Mg <sup>2+</sup>              | 9.0 | Strong | 8.9 | Strong |
| Cl <sup>-</sup>               | 4.6 | Strong | 4.4 | Strong |
| NO <sub>3</sub> <sup>-</sup>  | 5.6 | Strong | 8.2 | Strong |
| SO <sub>4</sub> <sup>2-</sup> | 9.0 | Strong | 9.0 | Strong |
| OC                            | 7.8 | Strong | 8.5 | Strong |
| EC                            | 7.7 | Strong | 8.3 | Strong |

**Table T4. Summary of PMF and error estimation diagnostics by PMF run during MAM period** (The red highlighted portion shows the factor considered in the study).

| Diagnostic                               | 5 factors | 6 factors | 7 factors |
|------------------------------------------|-----------|-----------|-----------|
| Q <sub>true</sub> /Q <sub>expected</sub> | 6.5       | 5.9       | 5.1       |
| DISP %dQ                                 | < 0.1%    | < 0.1%    | < 0.1%    |
| BS mapping < 100%                        | 88        | 100       | 72        |
| BS-DISP % swaps                          | 0         | 0         | 67        |

**Table T5. Summary of PMF and error estimation diagnostics by PMF run during CAM period.** (The red highlighted portion shows the factor considered in the study).

| Diagnostic                               | 4 factors | 5 factors | 6 factors |
|------------------------------------------|-----------|-----------|-----------|
| Q <sub>true</sub> /Q <sub>expected</sub> | 9.4       | 7.3       | 6.5       |
| DISP %dQ                                 | < 0.1%    | < 0.1%    | < 0.1%    |

|                   |    |     |     |
|-------------------|----|-----|-----|
| BS mapping < 100% | 91 | 100 | 100 |
| BS-DISP % swaps   | 0  | 0   | 17  |

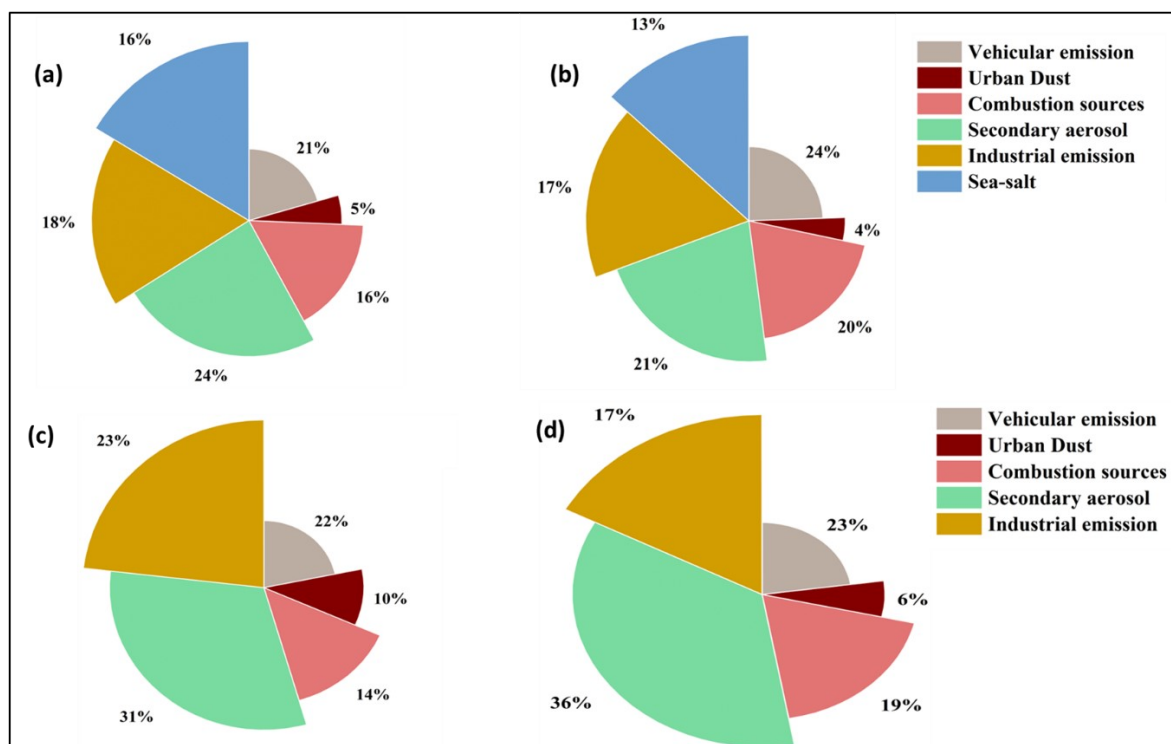

**Fig. S4. Percentage contributions of different sources to PM<sub>2.5</sub> mass concentration during (a) daytime (b) nighttime of MAM period (c) daytime (d) nighttime of CAM period**

**Table T6. Step-wise MLR-WLS through origin between DTTv and PMF source contributions during (a) MAM and (b) CAM periods.**

**Table T6 (a)**

| Model | Model | Unstandardized Coefficients | Standardized | t-stat | p- |
|-------|-------|-----------------------------|--------------|--------|----|
|-------|-------|-----------------------------|--------------|--------|----|



| No. |                     | (nmol.min <sup>-1</sup> .μg source <sup>-1</sup> ) |                | Coefficients |        | value |
|-----|---------------------|----------------------------------------------------|----------------|--------------|--------|-------|
|     |                     | B                                                  | Standard Error | Beta         |        |       |
| 1.  | Secondary aerosol   | 0.573                                              | 0.046          | 0.798        | 12.542 | 0.000 |
| 2.  | Secondary aerosol   | 0.366                                              | 0.056          | 0.509        | 6.549  | 0.000 |
|     | Industrial emission | 0.263                                              | 0.049          | 0.414        | 5.333  | 0.000 |
| 3.  | Secondary aerosol   | 0.259                                              | 0.054          | 0.360        | 4.828  | 0.000 |
|     | Industrial emission | 0.235                                              | 0.044          | 0.370        | 5.336  | 0.000 |
|     | Urban dust          | 0.225                                              | 0.044          | 0.309        | 5.078  | 0.000 |
| 4.  | Secondary aerosol   | 0.179                                              | 0.057          | 0.249        | 3.169  | 0.002 |
|     | Industrial emission | 0.203                                              | 0.043          | 0.320        | 4.745  | 0.000 |
|     | Urban dust          | 0.195                                              | 0.043          | 0.268        | 4.536  | 0.000 |
|     | Combustion sources  | 0.185                                              | 0.057          | 0.234        | 3.262  | 0.002 |
| 5.  | Secondary aerosol   | 0.111                                              | 0.055          | 0.154        | 1.999  | 0.039 |
|     | Industrial emission | 0.104                                              | 0.040          | 0.203        | 4.289  | 0.000 |
|     | Urban dust          | 0.131                                              | 0.043          | 0.180        | 3.034  | 0.003 |
|     | Combustion sources  | 0.209                                              | 0.053          | 0.264        | 3.941  | 0.000 |
|     | Vehicular emission  | 0.282                                              | 0.053          | 0.317        | 3.892  | 0.000 |

**Table T6 (b).**

| Model No. | Model              | Unstandardized Coefficients<br>(nmol.min <sup>-1</sup> .μg source <sup>-1</sup> ) |                | Standardized Coefficients | t-stat | p-value |
|-----------|--------------------|-----------------------------------------------------------------------------------|----------------|---------------------------|--------|---------|
|           |                    | B                                                                                 | Standard Error | Beta                      |        |         |
| 1.        | Vehicular emission | 1.548                                                                             | 0.070          | 0.886                     | 21.965 | 0.000   |
| 2.        | Vehicular emission | 1.000                                                                             | 0.095          | 0.573                     | 10.573 | 0.000   |
|           | Combustion sources | 0.850                                                                             | 0.114          | 0.403                     | 7.434  | 0.000   |

|    |                     |       |       |       |       |       |
|----|---------------------|-------|-------|-------|-------|-------|
| 3. | Vehicular emission  | 0.765 | 0.096 | 0.438 | 7.969 | 0.000 |
|    | Combustion sources  | 0.698 | 0.107 | 0.330 | 6.503 | 0.000 |
|    | Secondary aerosol   | 0.395 | 0.072 | 0.259 | 5.463 | 0.000 |
| 4. | Vehicular emission  | 0.678 | 0.092 | 0.388 | 7.342 | 0.000 |
|    | Combustion sources  | 0.551 | 0.106 | 0.261 | 5.181 | 0.000 |
|    | Secondary aerosol   | 0.369 | 0.068 | 0.242 | 5.417 | 0.000 |
|    | Industrial emission | 0.375 | 0.087 | 0.177 | 4.305 | 0.000 |
| 5. | Vehicular emission  | 0.687 | 0.091 | 0.393 | 7.559 | 0.000 |
|    | Combustion sources  | 0.452 | 0.113 | 0.214 | 4.001 | 0.000 |
|    | Secondary aerosol   | 0.364 | 0.067 | 0.238 | 5.426 | 0.000 |
|    | Industrial emission | 0.339 | 0.087 | 0.160 | 3.895 | 0.000 |
|    | Urban dust          | 0.101 | 0.044 | 0.088 | 2.317 | 0.022 |

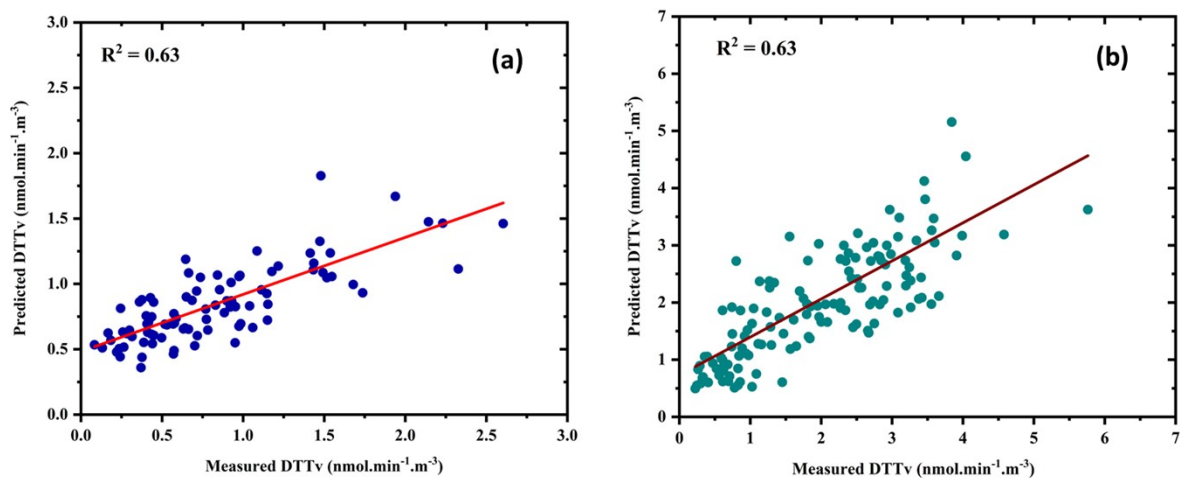

**Fig. S5. Linear regression between measured DTTv and predicted DTTv during (a) MAM (b) CAM periods.**
